# Supplementary material for: Binder-free Fe-doped NiCo2O4/Ni3S4 hollow heterostructure nanotubes for highly efficient overall water splitting
Source: Royal Society of Chemistry journal article supplement (doi:10.1039/d1dt02904e), 2021-01-01
Supplement: d1dt02904e1.pdf [file d1dt02904e1.pdf]

## **A Binder-free Fe-Doped NiCo<sub>2</sub>O<sub>4</sub>/Ni<sub>3</sub>S<sub>4</sub> Hollow Heterostructure**

### **Nanotubes for Highly Efficient Overall Water Splitting**

Zhaohui Liu, Bolin Zhao, Chenhao Pan, Hang Zhao\*

School of Material Science and Engineering, Shanghai Jiao Tong University,  
Shanghai 201100, China

\*Corresponding author

Email: [h-zhao@foxmail.com](mailto:h-zhao@foxmail.com)

## Electrochemical measurements details

The turnover frequency (TOF, s<sup>-1</sup>) for HER was calculated with the following equation:

$$\text{TOF}=(|J| \times A) / 2Fn$$

(1)

Where  $|J|$  (A·cm<sup>-2</sup>) is the current density at a fixed voltage during the LSV measurement,  $A$  is the geometric area of the working electrode (1 cm<sup>2</sup>), the factor of 2 is the corresponding electron transfer numbers,  $F$  is the Faraday constant (96485 C·mol<sup>-1</sup>), and  $n$  is the number of active sites (mol).

$$n=Q/2F$$

(2)

The number of active sites ( $n$ ) was determined by the cyclic voltammetry (CV) with a scan rate of 10 mV s<sup>-1</sup>. The number of the voltammetric charges ( $Q$ ) could be determined by integrating.

The turnover frequency (TOF, s<sup>-1</sup>) for OER was calculated with the following equation:

$$\text{TOF}=(|J| \times A) / 4Fn$$

(3)

$$n=Q/4F$$

(4)

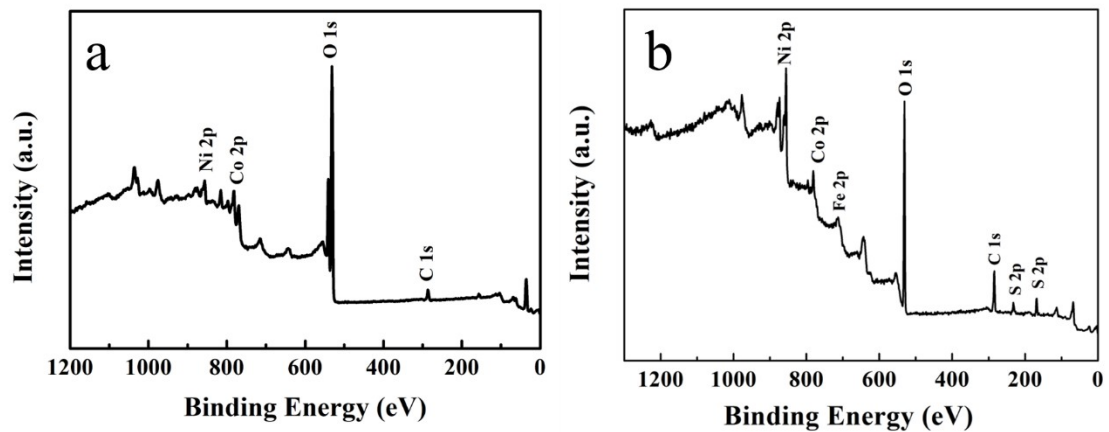

Fig.S1 XPS survey spectra of Ni-O (a) and Ni-O-S (b).

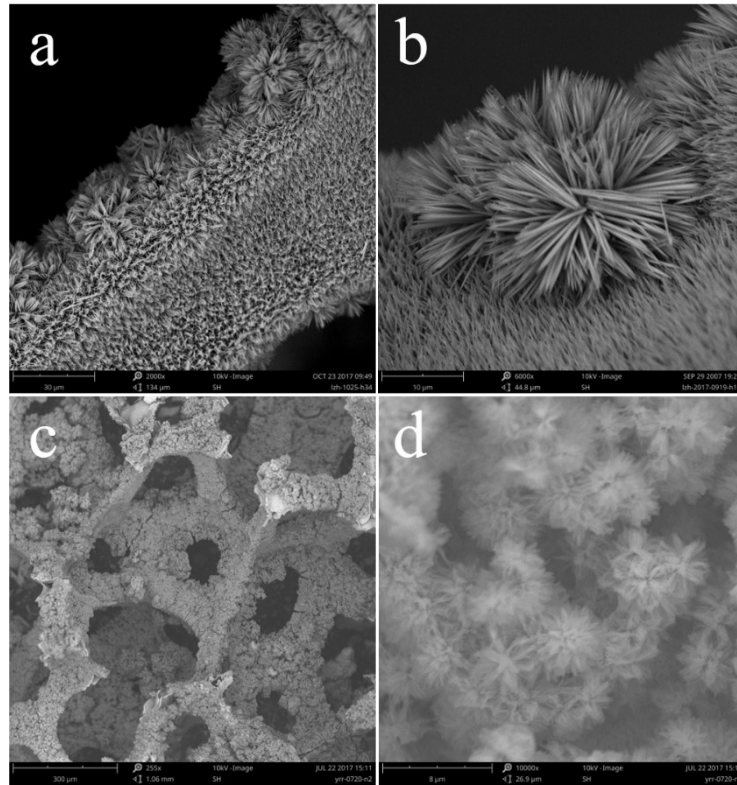

Fig. S2 SEM image of Ni-O (a, b) and Ni-S (c, d).

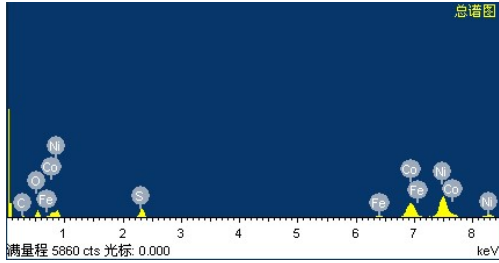

| Element | Weight (%) | Atomic (%) |
|---------|------------|------------|
| C K     | 0.20       | 0.88       |
| O K     | 3.35       | 10.96      |
| S K     | 3.09       | 5.04       |
| Fe K    | 1.05       | 0.98       |
| Co K    | 32.00      | 28.41      |
| Ni K    | 60.31      | 53.74      |

Fig. S3 EDS and element content of Ni-O-S.

Comment [P]: Revised: "The element content of Ni-O-S" was added.

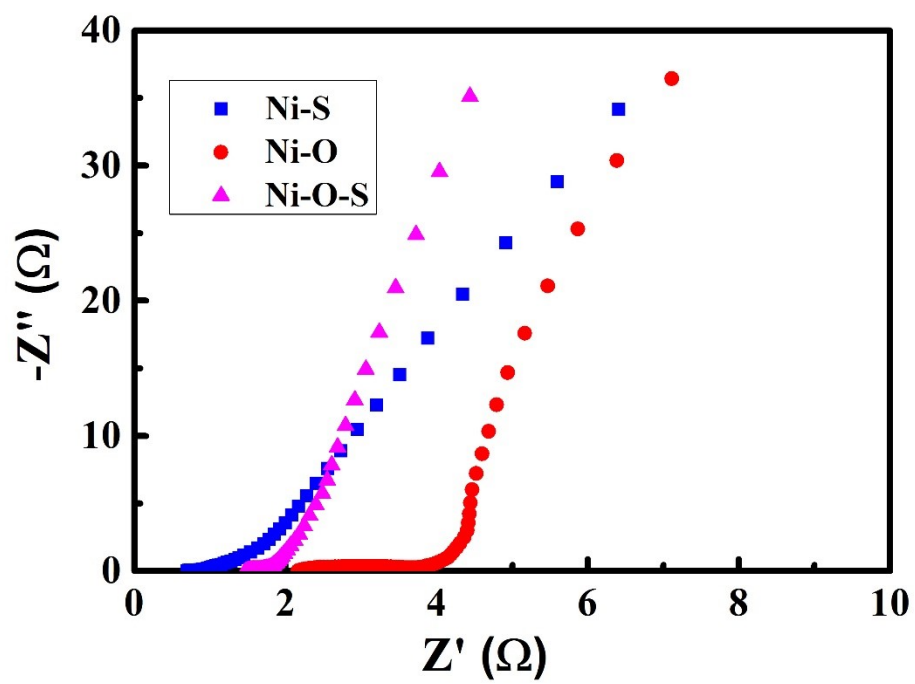

Fig. S4 Nyquist plots of various as-prepared samples.

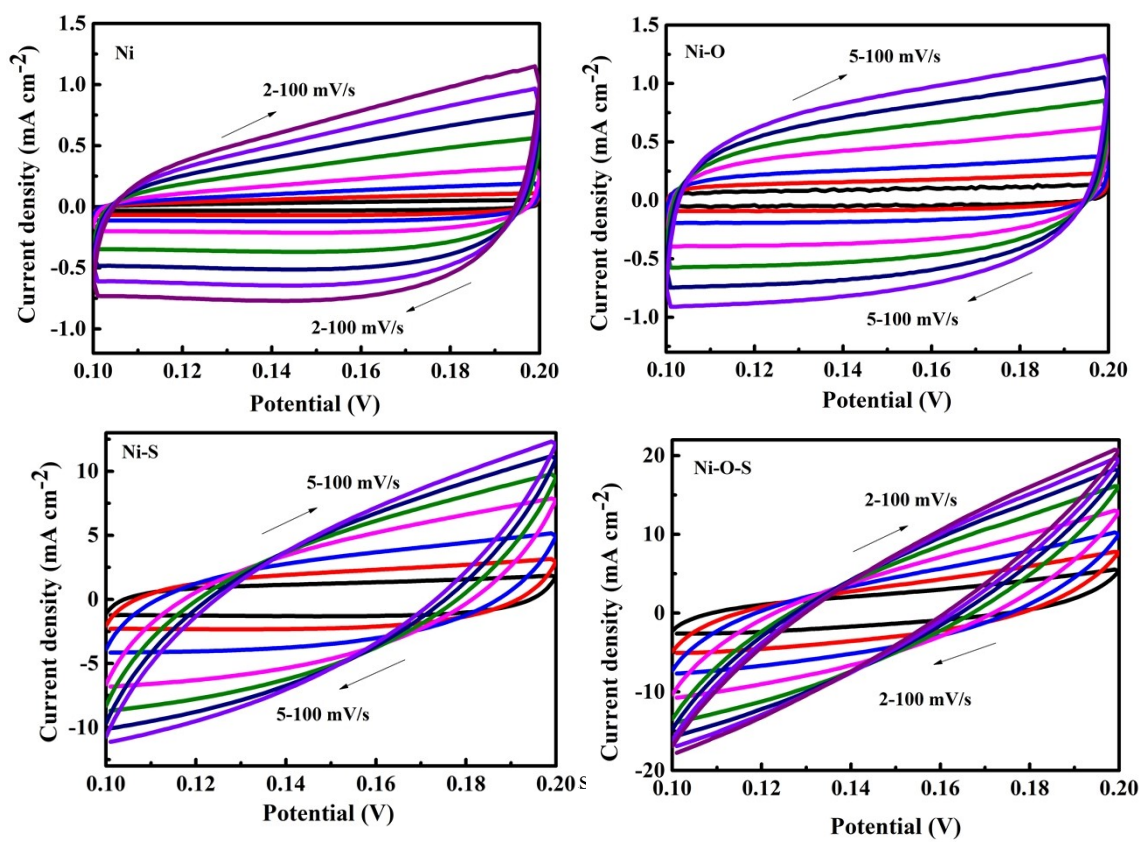

Fig. S5 CV curves of the different catalysts for the HER in 1 M KOH.

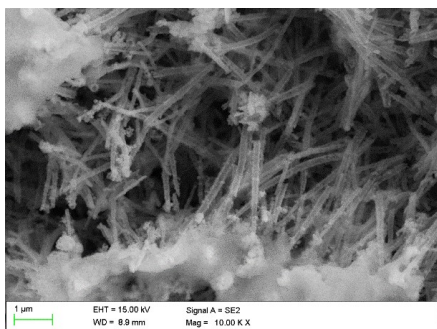

| Element | Weight (%) | Atomic (%) |
|---------|------------|------------|
| O K     | 2.45       | 8.32       |
| S K     | 1.81       | 3.07       |
| Fe K    | 1.45       | 1.41       |
| Co K    | 33.79      | 31.18      |
| Ni K    | 60.50      | 56.03      |

Fig. S6 SEM image and element content of Ni-O-S after stability test.

Comment [P]: Revised: Fig. S6 was added.



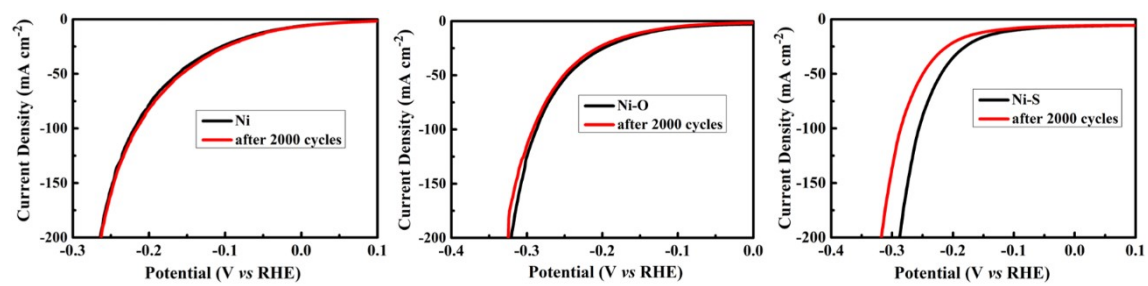

Fig. S7 polarization curves of Ni, Ni-O, Ni-S before and after 2000 potential cycles for HER.

Comment [P]: Revised: "Fig. S7" was changed to "Fig. S8".

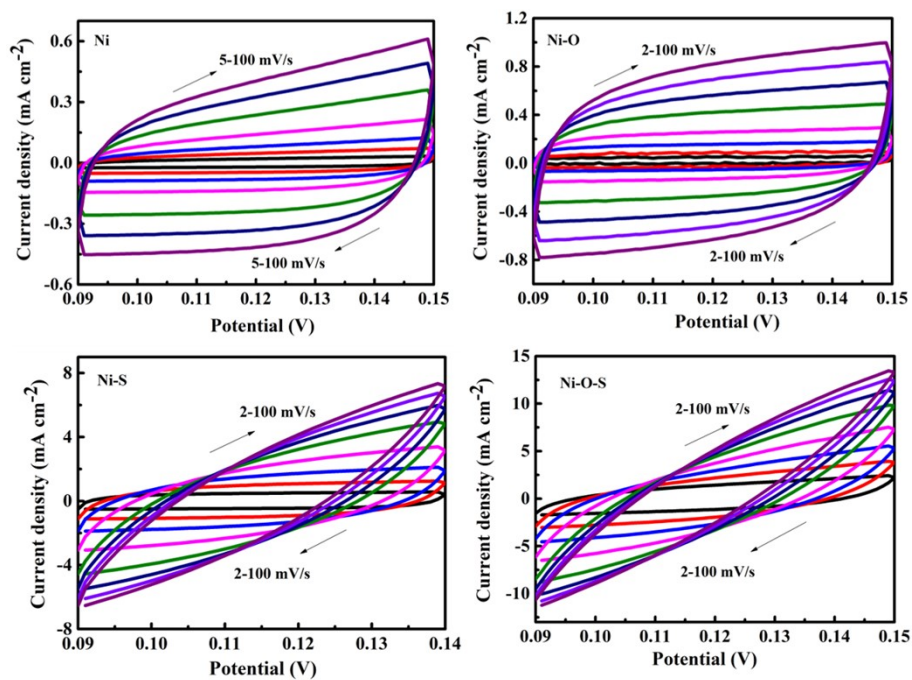

Fig. S8 CV curves of the different catalysts for the OER in 1 M KOH.

Comment [P]: Revised: "Fig. S8" was changed to "Fig. S9".

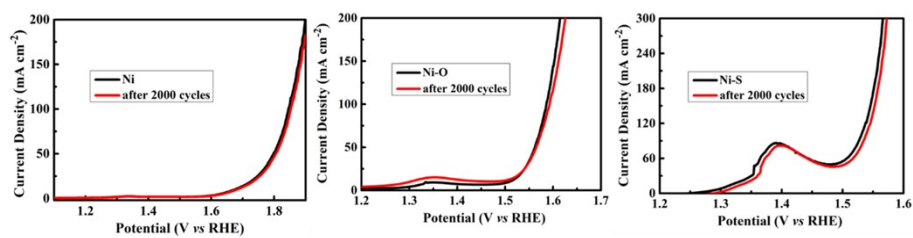

Fig. S9 polarization curves of Ni, Ni-O, Ni-S before and after 2000 potential cycles for OER.

**Comment [P]:** Revised: "Fig. S9" was changed to "Fig. S10".

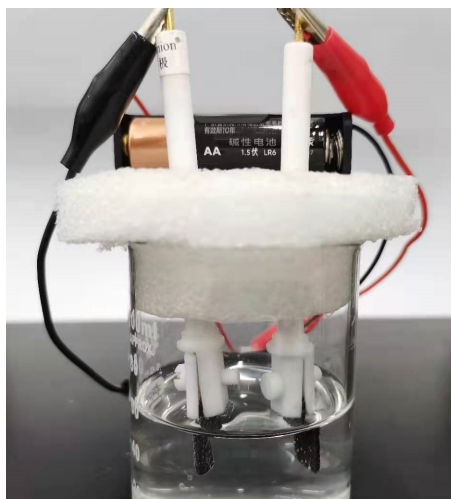

**Fig. S10** A digital image of overall water splitting.

Comment [P]: Revised: "Table S1" was added.

Table S1. Comparison of some recently reported representative electrocatalysts for overall water splitting in 1 M KOH electrolyte.

| Catalyst                                                              | Overpotential for HER at 10 mA cm <sup>-2</sup> (mV) | Overpotential for OER at 10 mA cm <sup>-2</sup> (mV) | Cell voltage (V) | literature |
|-----------------------------------------------------------------------|------------------------------------------------------|------------------------------------------------------|------------------|------------|
| NiCo <sub>2</sub> O <sub>4</sub> /Cu <sub>x</sub> O                   | 92                                                   | 213                                                  | 1.61             | [2]        |
| NiFe-LDH@CoS <sub>x</sub>                                             | 136                                                  | 206                                                  | 1.537            | [3]        |
| CoMoNiS-NF-31                                                         | 113                                                  | 166                                                  | 1.54             | [5]        |
| Fe-Co-O/Co@NC-mNS/NF                                                  | 112                                                  | 257                                                  | 1.58             | [15]       |
| Ni <sub>x</sub> Fe <sub>1-x</sub> (OH) <sub>2</sub>                   | -                                                    | 244                                                  | 1.64             | [24]       |
| MoS <sub>2</sub> -Ni <sub>3</sub> S <sub>2</sub>                      | 98                                                   | 249                                                  | 1.50             | [33]       |
| Mo-Ni <sub>3</sub> S <sub>2</sub> /Ni <sub>x</sub> P <sub>y</sub> /NF | 109                                                  | 238 (50 mA)                                          | 1.46             | [40]       |
| NiCo <sub>2</sub> O <sub>4</sub> @NiMo <sub>2</sub> S <sub>4</sub>    | 159                                                  | 310 (20 mA)                                          | 1.63 (50 mA)     | [41]       |
| Ni-O-S                                                                | 29.1                                                 | 259 (100 mA)                                         | 1.45             | This work  |
